# Supplementary material for: Simulation of CO2 Capture Process in Flue Gas from Oxy-Fuel Combustion Plant and Effects of Properties of Absorbent
Source: MDPI journal article supplement (doi:10.3390/separations9040095), 2022-04-11
Supplement: s1 [file s1]

## Supporting Information

### Simulation of CO<sub>2</sub> Capture Process in Flue Gas from Oxy-fuel Combustion Plant and Effects of Properties of Absorbent

Xiaoting Huang<sup>1,3</sup>, Ning Ai<sup>1,2,\*</sup>, Lan Li<sup>2</sup>, Quanda Jiang<sup>3</sup>, Qining Wang<sup>2</sup>, Jie Ren<sup>1,\*</sup>, Jiawei Wang<sup>4</sup>

1 College of Biological Chemical Science and Engineering, Jiaxing University, Jiaxing;

2 College of Chemical Engineering, Zhejiang University of Technology, Hangzhou, Zhejiang, China;

3 ZheJiang Supcon Software Co., LTD, Hangzhou, Zhejiang, China;

4 Energy and Bioproducts Research Institute, Aston University, Birmingham B4 7ET, West Midlands, England; \*

Corresponding author

Ning Ai: E-mail address: aining@tsinghua.org.cn;

Jie Ren: E-mail address: renjie@zjxu.edu.cn;

Table S1. The properties of ionic liquid solvent

| Properties             | Value  |
|------------------------|--------|
| Inlet temperature(°C)  | 35.0   |
| Outlet temperature(°C) | 46.4   |
| Flowrate(kmol/h)       | 8276.2 |
